# Supplementary material for: In vitro antiproliferative activity of palladium(ii) thiosemicarbazone complexes and the corresponding functionalized chitosan coated magnetite nanoparticles
Source: Royal Society of Chemistry journal article supplement (doi:10.1039/c5nj02429c), 2015-12-11
Supplement: c5nj02429c1.pdf [file c5nj02429c1.pdf]

***In Vitro* Antiproliferative Activity of Palladium(II) Thiosemicarbazone  
Complexes and the Corresponding Functionalized Chitosan Coated  
Magnetite Nanoparticles**

W. Hernández, A. J. Vaisberg, M. Tobar, M. Álvarez, J. Manzur\*,  
Y. Echevarría\*, E. Spodine\*.

**Supplementary Information**

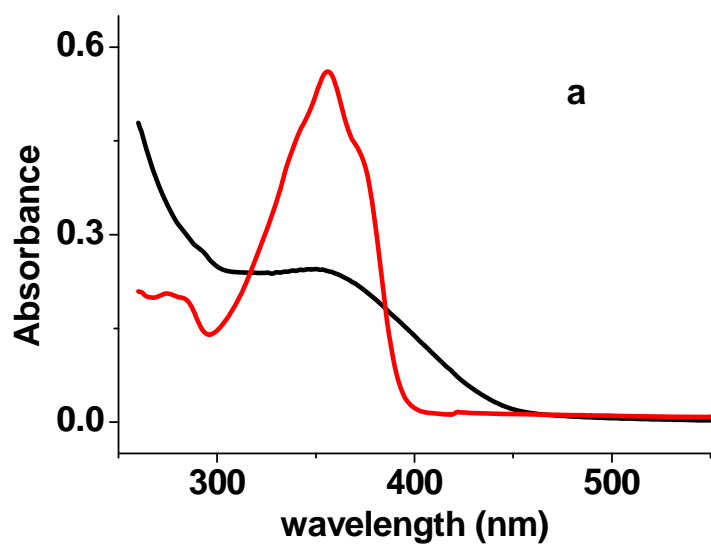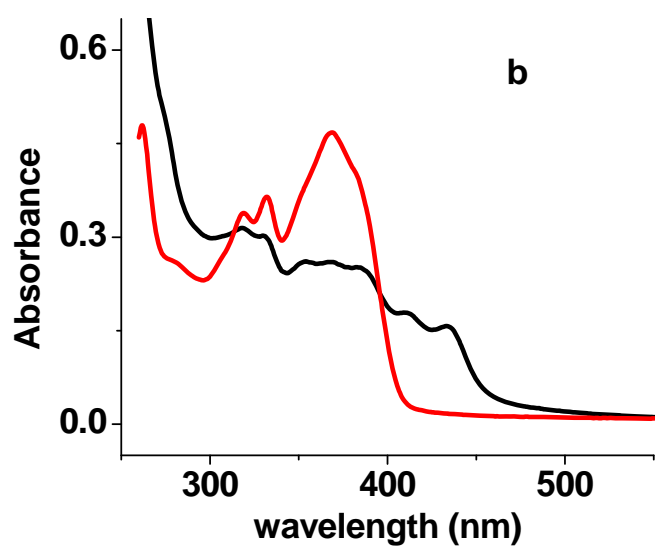

Figure S1. a) L<sup>2</sup>H (red) and Pd(L<sup>2</sup>)<sub>2</sub> (black); b) L<sup>3</sup>H (red) and Pd(L<sup>3</sup>)<sub>2</sub> (black).

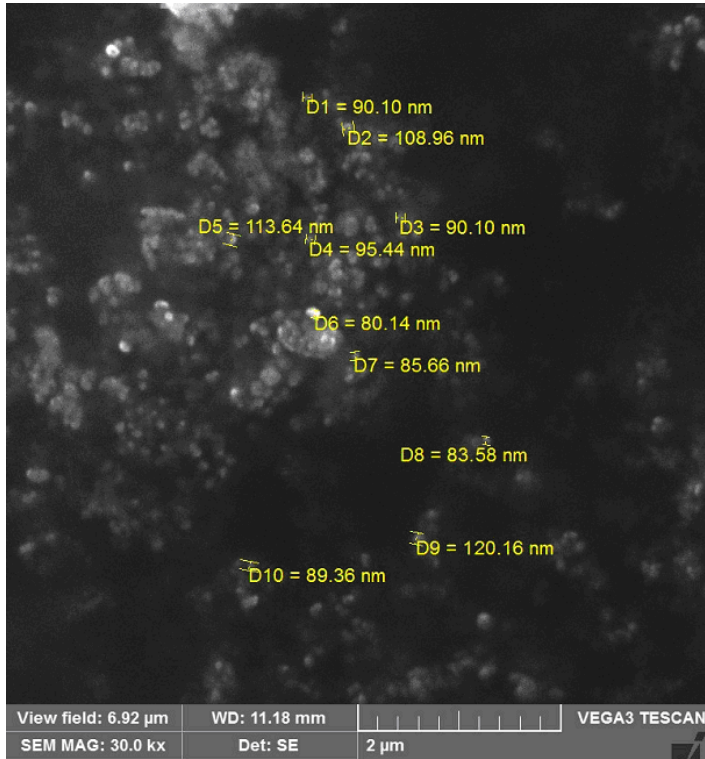

a)

| Value      | d [nm] |
|------------|--------|
| Obj. count | 10     |
| Summation  | 957.15 |
| Min. value | 80.14  |
| Max. value | 120.16 |
| Mean value | 95.71  |
| Std. dev.  | 13.00  |

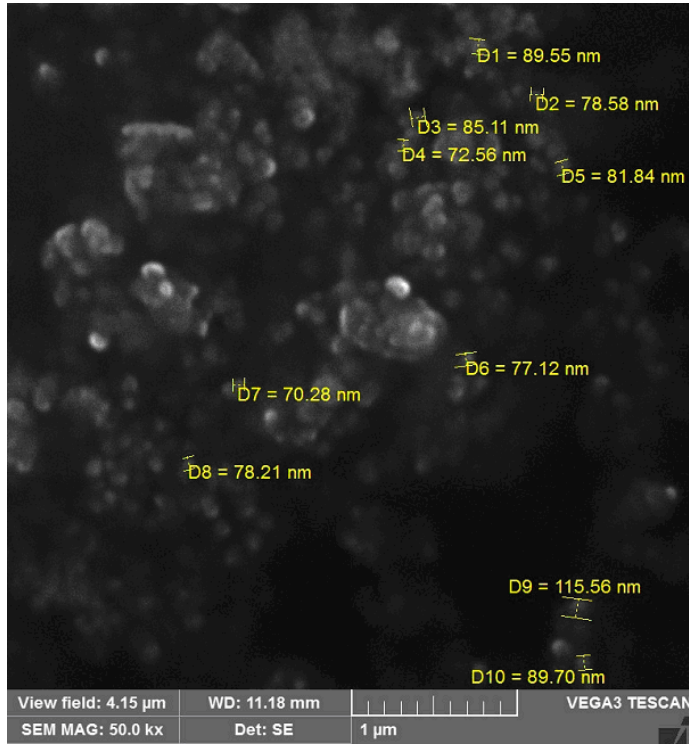

b)

| Value      | d [nm] |
|------------|--------|
| Obj. count | 10     |
| Summation  | 838.51 |
| Min. value | 70.28  |
| Max. value | 115.56 |
| Mean value | 83.85  |
| Std. dev.  | 12.22  |

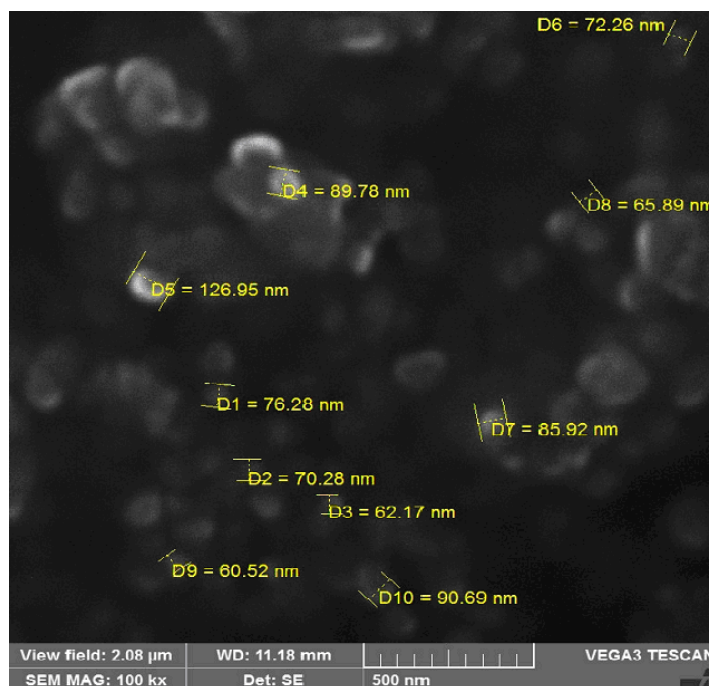

c)

| Value      | d [nm] |
|------------|--------|
| Obj. count | 10     |
| Summation  | 838.51 |
| Min. value | 70.28  |
| Max. value | 115.56 |
| Mean value | 83.85  |
| Std. dev.  | 12.22  |

Figure S2. SEM images of coated nanoparticles. a) magnification = 30.000, b) 50.000, c) 100.000

Table S1. Molar extinction coefficients of complexes

| Complex                          | log $\epsilon$ ( $\lambda$ nm)                                                          |
|----------------------------------|-----------------------------------------------------------------------------------------|
| Pd(L <sup>1</sup> ) <sub>2</sub> | 4.29 (355); 4.30 (370); 4.24 (388)                                                      |
| Pd(L <sup>2</sup> ) <sub>2</sub> | 4.51 (350)                                                                              |
| Pd(L <sup>3</sup> ) <sub>2</sub> | 4.46 (318); 4.44 (332);<br>4.41 (355); 4.41 (369); 4.40 (382)<br>4.25 (410); 4.19 (433) |
| Pd(L <sup>4</sup> ) <sub>2</sub> | 4.41 (319); 4.42 (331); 4.36 (358)<br>4.37 (373); 4.34 (389); 4.21 (422)<br>4.13 (444)  |
